# Supplementary material for: Dose-Dependent Outcome of EBV Infection of Humanized Mice Based on Green Raji Unit (GRU) Doses
Source: MDPI journal article supplement (doi:10.3390/v13112184), 2021-10-29
Supplement: s1 [file s1]

**Dose-dependent outcome of EBV infection of humanized mice based on Green Raji Unit (GRU)**

**doses**

Haiwen Chen, Ling Zhong, Wanlin Zhang, Shanshan Zhang, Junping Hong, Xiang Zhou, Xinyu Zhang,

Qisheng Feng, Yixin Chen, Yi-Xin Zeng, Miao Xu, Claude Krummenacher, Xiao Zhang

Supplementary figures

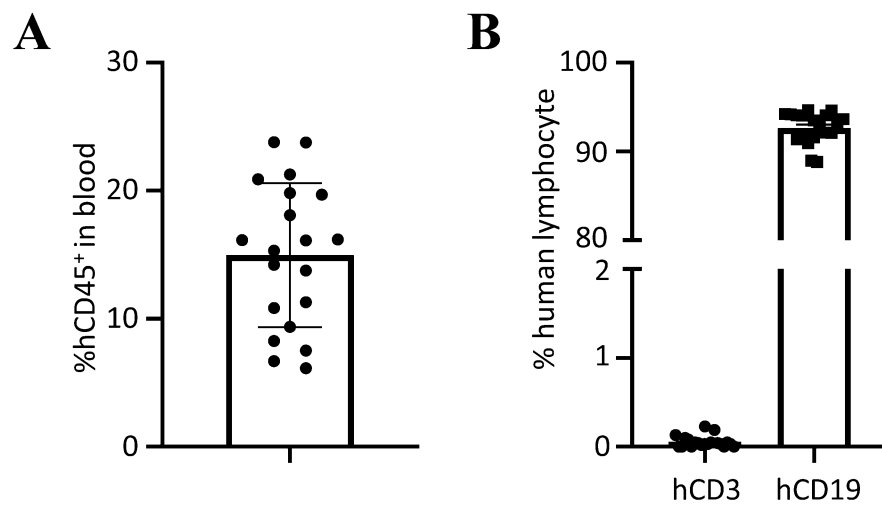

**Figure S1.** Frequency of human (h) hCD45<sup>+</sup> (left) and, hCD19<sup>+</sup> and hCD3<sup>+</sup> cells (right) were measured 8 weeks following CD34<sup>+</sup> stem cells engraftment but prior to viral challenge. Each dot represents a different mouse, n = 20.

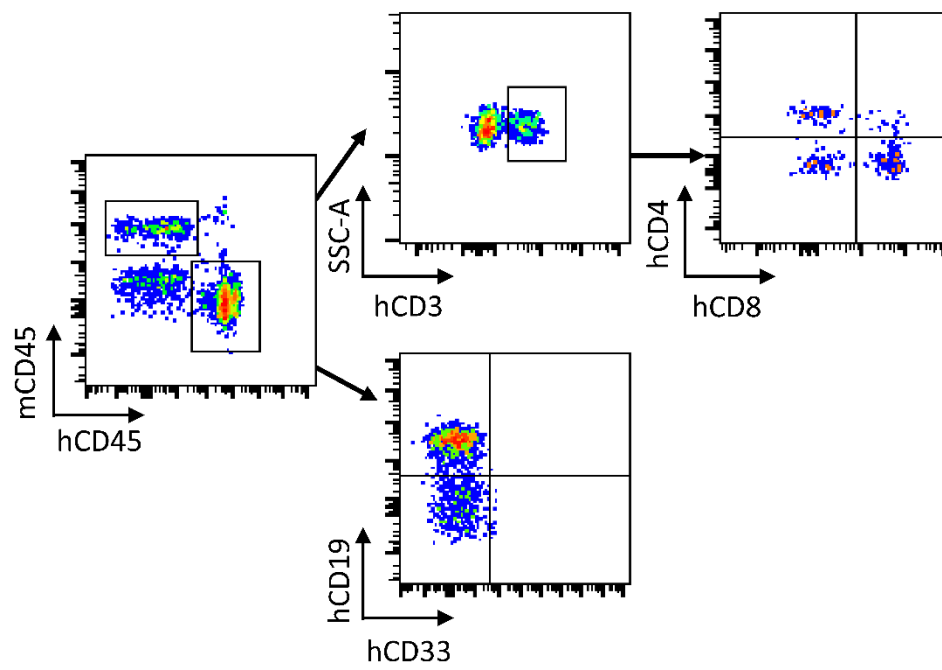

**Figure S2.** Representative flow plot showing the gating strategy used to analyze peripheral blood.

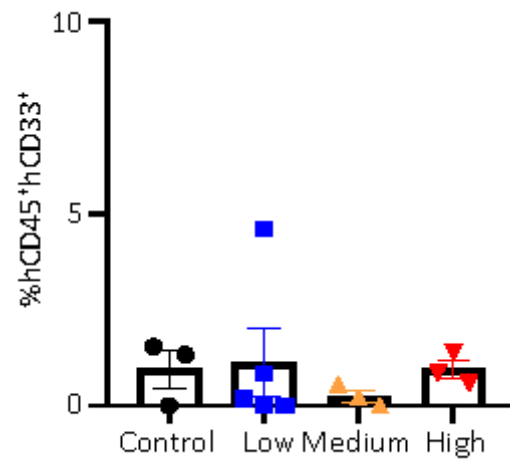

**Figure S3.** Splenic lymphocytes were analyzed in EBV-infected humanized mice. The frequency of hCD33<sup>+</sup> myeloid cells in spleens at the study endpoint. Data points represent Mean  $\pm$  SEM of uninfected control mice (n = 3), low (n = 5), medium (n = 3), high (n = 3) doses GRUs of Akata-EBV-GFP infected mice.

# Supplementary table

**Table S1.** Primers for RT-PCR to detect EBV transcripts.

| Primer  | Sequence (5'→3')               |
|---------|--------------------------------|
| EBNA1   |                                |
| Forward | aaggccattttccacctgtaggggatgc   |
| Reverse | tcactcctgccttctcacctcatctcc    |
| EBNA2   |                                |
| Forward | ggacacaagagccatcacctttagatagg  |
| Reverse | aatggcataggtggaatgtataaaataca  |
| LMP2A   |                                |
| Forward | atgaatccagtatgcctgcctgtaattgtt |
| Reverse | ccagaaggatcttggcagtgacatgaag   |
| LMP1    |                                |
| Forward | tcatggaccagcacactgatgaacacca   |
| Reverse | caccggaaccagaagtacccaaaagcagcg |
| EBER1   |                                |
| Forward | aggacctacgtgccttagaggtttgcta   |
| Reverse | aaaacatgcggaccaccagctggctactga |
| BZLF1   |                                |
| Forward | atgatggaccaaactcgacttctgaagat  |
| Reverse | ttagaaatttaagagatcctcgtgtaaaac |
| BMRF1   |                                |
| Forward | ctagccgtcctgtccaagtctatgacat   |
| Reverse | cgtggtagcgtagagatccggattgagtgt |
| BLLF1   |                                |
| Forward | agccttgctgtgtgtcagtacacatcca   |
| Reverse | ggcaccacatgggtccaacacatcttgaa  |
| GAPDH   |                                |
| Forward | gcctcctgcaccaccaactg           |
| Reverse | cgacgcctgcttcaccacctct         |
